# Supplementary material for: LINC02362 attenuates hepatocellular carcinoma progression through the miR-516b-5p/SOSC2 axis
Source: Aging (Albany NY). 2022 Jan 6;14(1):368–88. doi: 10.18632/aging.203813 (PMC8791201; doi:10.18632/aging.203813)
Supplement: Supplementary Figures [file aging-14-203813-s001.pdf]

SUPPLEMENTARY FIGURES

| ----- IncLocator Prediction Result ----- |                  |
|------------------------------------------|------------------|
| Subcellular locations                    | score            |
| Cytoplasm                                | 0.844761316248   |
| Nucleus                                  | 0.0188670440491  |
| Ribosome                                 | 0.0191748094148  |
| Cytosol                                  | 0.1153390012     |
| Exosome                                  | 0.00185782908802 |

| Predicted location |
|--------------------|
| Cytoplasm          |

Supplementary Figure 1. *LINC02362* is mainly localized in the cytoplasm by database mining. Results from IncLocator (<http://www.csbio.sjtu.edu.cn/bioinf/IncLocator/>) for predicting the localization of *LINC02362*.

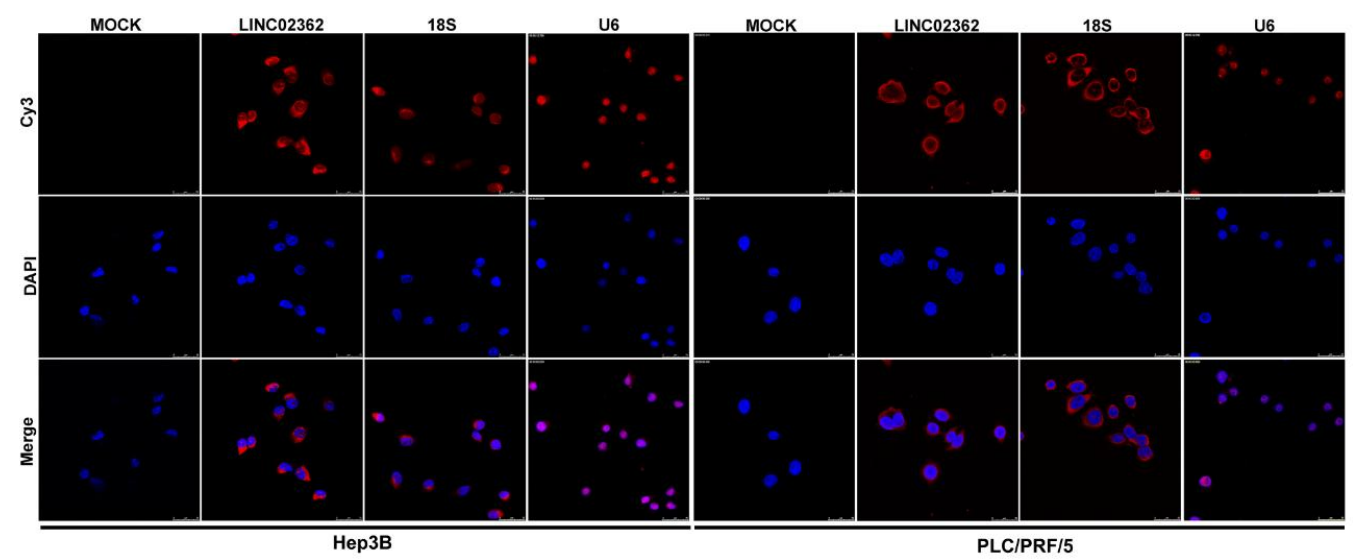

Supplementary Figure 2. *LINC02362* is localized in the cytoplasm. Representative images from RNA fluorescent *in situ* hybridization (FISH) for detecting *LINC02362*, 18S or U6 RNA. DAPI was applied to stain the nucleus.
