# Supplementary material for: LINC02362 attenuates hepatocellular carcinoma progression through the miR-516b-5p/SOSC2 axis
Source: publisher site journal article supplement (doi:10.18632/aging.203813), 2022-01-06
Supplement: Supplementary file [file aging-v14i1-203813-supplementary-material-SD2.pdf]

## SUPPLEMENTARY TABLES

**Supplementary Table 1. Primers for plasmid construction and RT-qPCR.**

| Primers                               |    | Sequence (5'-3')                                            |
|---------------------------------------|----|-------------------------------------------------------------|
| ShSOCS2                               | F  | CCGGCATTTCAGACTACCTACTAACACTCGAGTGTAGTAGGTAGTCTGAATGTTTT    |
|                                       | R  | AATTAACAAACATTTCAGACTACCTACTAACACTCGAGTGTAGTAGGTAGTCTGAATG  |
| ShLINC02362                           | F  | CCGGGGATGTCTGTTCACACCTCAGGCTCGAGCCTGAGGTGTGACAGACATCCTTTTT  |
|                                       | R  | AATTAACAAAGGATGTCTGTTCACACCTCAGGCTCGAGCCTGAGGTGTGACAGACATCC |
| U6                                    | RT | AACGCTTCACGAATTTGCGT                                        |
|                                       | QF | CTCGCTTCGGCAGCACA                                           |
|                                       | QR | AACGCTTCACGAATTTGCGT                                        |
|                                       | RT | GTCGTATCCAGTGCAGGGTCCGAGGTATTTCGCACTGGATACGACAAAGTG         |
| miR-516b-5p                           | QF | GCGCGATCTGGAGGTAAGAAG                                       |
|                                       | QR | AGTGCAGGGTCCGAGGTATT                                        |
| 18S                                   | F  | AGGCGCGCAAATTACCCAATCC                                      |
|                                       | R  | GCCCTCCAATTGTTCCCTCGTTAAG                                   |
| SOCS2                                 | F  | GGTCGGCGGAGGAGCCATCC                                        |
|                                       | R  | GAAAGTTCCTTCTGGTGCCTCTT                                     |
| LINC02362                             | F  | TGGAGGATACTGGTCTGA                                          |
|                                       | R  | TGCTGCCTTATCTGGAAT                                          |
| mimic NC                              | F  | UUCUCCGAACGUGUCACGUTT                                       |
|                                       | R  | ACGUGACACGUUCGGAGAATT                                       |
| miR-516b-5p mimic                     | F  | AGUGCUUCUUACCUCCAGAUUU                                      |
|                                       | R  | AUCUGGAGGUAAGAAGCACUUU                                      |
| Inhibitor NC<br>miR-516b-5p inhibitor |    | CAGUACUUUUGUGUAGUACAA                                       |
|                                       |    | AGUGCUUCUUACCUCCAGAUUU                                      |

**Supplementary Table 2. Antibodies for western blotting.**

| Antibodies                    | Provider                  | Catalog no. | Dilution |
|-------------------------------|---------------------------|-------------|----------|
| GAPDH                         | Proteintech, Wuhan, China | 10494-1-AP  | 1:3000   |
| SOCS2                         | Abcam, Shanghai, China    | ab109245    | 1:2000   |
| E-cadherin                    | Proteintech, Wuhan, China | 20874-1-AP  | 1:6000   |
| N-cadherin                    | Proteintech, Wuhan, China | 22018-1-AP  | 1:3000   |
| Vimentin                      | Proteintech, Wuhan, China | 10366-1-AP  | 1:3000   |
| HRP Goat Anti-mouse IgG(H+L)  | Proteintech, Wuhan, China | SA00001-1   | 1:10000  |
| HRP Goat Anti-Rabbit IgG(H+L) | Proteintech, Wuhan, China | SA00001-2   | 1:10000  |

**Supplementary Table 3. Correlation between clinicopathological variables and LINC02362 expression in HCC.**

|                   | Total<br>(N=339) | LINC02362 Expression |                | P-value       |
|-------------------|------------------|----------------------|----------------|---------------|
|                   |                  | High<br>(N=144)      | Low<br>(N=195) |               |
| <b>Age (year)</b> |                  |                      |                |               |
| < 65              | 208 (61.4%)      | 76 (52.8%)           | 132 (67.7%)    | <b>0.0074</b> |
| ≥ 65              | 131 (38.6%)      | 68 (47.2%)           | 63 (32.3%)     |               |
| <b>Gender</b>     |                  |                      |                |               |
| Male              | 231 (68.1%)      | 109 (75.7%)          | 122 (62.6%)    | <b>0.0144</b> |
| Female            | 108 (31.9%)      | 35 (24.3%)           | 73 (37.4%)     |               |

|                                 |             |             |             |                  |
|---------------------------------|-------------|-------------|-------------|------------------|
| <b>Family history of cancer</b> |             |             |             |                  |
| NO                              | 196 (57.8%) | 72 (50.0%)  | 124 (63.6%) | <b>0.0362</b>    |
| YES                             | 98 (28.9%)  | 51 (35.4%)  | 47 (24.1%)  |                  |
| Unknown                         | 45 (13.3%)  | 21 (14.6%)  | 24 (12.3%)  |                  |
| <b>TNM stage</b>                |             |             |             |                  |
| I                               | 170 (50.1%) | 81 (56.2%)  | 89 (45.6%)  | 0.182            |
| II                              | 84 (24.8%)  | 34 (23.6%)  | 50 (25.6%)  |                  |
| III                             | 81 (23.9%)  | 27 (18.8%)  | 54 (27.7%)  |                  |
| IV                              | 4 (1.2%)    | 2 (1.4%)    | 2 (1.0%)    |                  |
| <b>Histologic grade</b>         |             |             |             |                  |
| G1–G2                           | 212 (62.5%) | 105 (72.9%) | 107 (54.9%) | <b>0.0027</b>    |
| G3–G4                           | 125 (36.9%) | 38 (26.4%)  | 87 (44.6%)  |                  |
| Unknown                         | 2 (0.6%)    | 1 (0.7%)    | 1 (0.5%)    |                  |
| <b>Ishak score</b>              |             |             |             |                  |
| 0-4                             | 124 (36.6%) | 63 (43.8%)  | 61 (31.3%)  | <b>0.0038</b>    |
| 5-6                             | 74 (21.8%)  | 36 (25.0%)  | 38 (19.5%)  |                  |
| Unknown                         | 141 (41.6%) | 45 (31.2%)  | 96 (49.2%)  |                  |
| <b>Child–Pugh grade</b>         |             |             |             |                  |
| A                               | 207 (61.1%) | 98 (68.1%)  | 109 (55.9%) | 0.0722           |
| B-C                             | 21 (6.2%)   | 8 (5.6%)    | 13 (6.7%)   |                  |
| Unknown                         | 111 (32.7%) | 38 (26.4%)  | 73 (37.4%)  |                  |
| <b>Vascular invasion</b>        |             |             |             |                  |
| None                            | 193 (56.9%) | 94 (65.3%)  | 99 (50.8%)  | <b>0.0429</b>    |
| Micro                           | 84 (24.8%)  | 30 (20.8%)  | 54 (27.7%)  |                  |
| Macro                           | 14 (4.1%)   | 3 (2.1%)    | 11 (5.6%)   |                  |
| Unknown                         | 48 (14.2%)  | 17 (11.8%)  | 31 (15.9%)  |                  |
| <b>Alpha fetoprotein</b>        |             |             |             |                  |
| Negative                        | 143 (42.2%) | 86 (59.7%)  | 57 (29.2%)  | <b>&lt;0.001</b> |
| Positive                        | 120 (35.4%) | 30 (20.8%)  | 90 (46.2%)  |                  |
| Unknown                         | 76 (22.4%)  | 28 (19.4%)  | 48 (24.6%)  |                  |
| <b>Residual tumor</b>           |             |             |             |                  |
| R0                              | 301 (88.8%) | 127 (88.2%) | 174 (89.2%) | 0.924            |
| R1-R2                           | 12 (3.5%)   | 5 (3.5%)    | 7 (3.6%)    |                  |
| Unknown                         | 26 (7.7%)   | 12 (8.3%)   | 14 (7.2%)   |                  |
| <b>Living status</b>            |             |             |             |                  |
| Alive                           | 224 (66.1%) | 106 (73.6%) | 118 (60.5%) | <b>0.0163</b>    |
| Dead                            | 115 (33.9%) | 38 (26.4%)  | 77 (39.5%)  |                  |
| <b>Disease status</b>           |             |             |             |                  |
| NO                              | 163 (48.1%) | 65 (45.1%)  | 98 (50.3%)  | 0.536            |
| YES                             | 132 (38.9%) | 61 (42.4%)  | 71 (36.4%)  |                  |
| Unknown                         | 44 (13.0%)  | 18 (12.5%)  | 26 (13.3%)  |                  |
